# Supplementary material
Source: PubMed Central journal article supplement (PMC3391346)
Supplement: NIHMS380822-supplement-3.pdf [file NIHMS380822-supplement-3.pdf]

ESM Table 2. Power for association of a two-cohort design

| Variance explained by gene | Power for n=638 for 1 <sup>st</sup> cohort (HTN-IR) | Power for n=676 for 2 <sup>nd</sup> cohort (MACAD) | Overall power |
|----------------------------|-----------------------------------------------------|----------------------------------------------------|---------------|
| 0.01                       | 0.72                                                | 0.74                                               | 0.53          |
| 0.012                      | 0.79                                                | 0.82                                               | 0.65          |
| 0.014                      | 0.85                                                | 0.87                                               | 0.74          |
| 0.016                      | 0.89                                                | 0.91                                               | 0.81          |
| 0.018                      | 0.93                                                | 0.94                                               | 0.87          |
| 0.02                       | 0.95                                                | 0.96                                               | 0.91          |
| 0.03                       | 0.99                                                | 0.99                                               | 0.99          |

HTN-IR, Hypertension-Insulin Resistance cohort; MACAD, Mexican-American Coronary Artery Disease cohort
